# Supplementary material for: Contribution of sleep to the repair of neuronal DNA double-strand breaks: evidence from flies and mice
Source: PubMed Central journal article supplement (PMC5103291; doi:10.1038/srep36804), 2016-11-10
Supplement: srep36804-s1.pdf [file srep36804-s1.pdf]

**Contribution of sleep to the repair of neuronal DNA double-strand breaks:  
evidence from flies and mice**

Michele Bellesi<sup>1,2#</sup>, Daniel Bushey<sup>1#</sup>, Mattia Chini<sup>1</sup>, Giulio Tononi<sup>1</sup> and Chiara Cirelli<sup>1\*</sup>

<sup>1</sup> Department of Psychiatry, University of Wisconsin-Madison, 6001 Research Park Blvd,  
Madison, WI 53719 USA

<sup>2</sup> Department of Experimental and Clinical Medicine, Section of Neuroscience and Cell  
Biology, Università Politecnica delle Marche, Ancona, Italy

#, co-first authors

\* Correspondence:

Chiara Cirelli, MD PhD

Department of Psychiatry, University of Wisconsin - Madison

6001 Research Park Blvd

53719 Madison, Wisconsin, USA

ccirelli@wisc.edu

**Supplementary Figure 1 | Effects of gamma-irradiation on DSBs in non-neuronal cells.** **a**, Representative example of a cortical field from an IRR male mouse. Manually segmented non-neuronal cells are depicted in orange (left panel). PI staining (blue) and  $\gamma$ H2AX fluorescence (green) are represented in the middle and right panel, respectively. Arrow indicates a non-neuronal cell that shows weak  $\gamma$ H2AX fluorescence (green) in the right panel. Scale bar: 5 $\mu$ m. **b**, Averaged ratio (in %) between the  $\gamma$ H2AX fluorescence of manually segmented non-neuronal cells and the whole (non-neuronal+neuronal)  $\gamma$ H2AX fluorescence in IRR male mice (n=6).

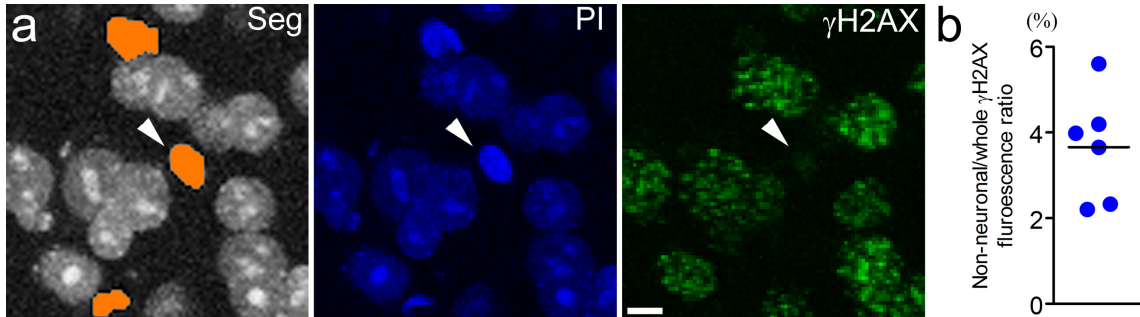

**Supplementary Table 1 | Top functional annotation clusters with enrichment score > 1 for W and EW groups.**

| <b>Up-regulated in W</b>       |                         | <b>Up-regulated in EW</b>            |                         |
|--------------------------------|-------------------------|--------------------------------------|-------------------------|
| <b>Cluster</b>                 | <b>Enrichment Score</b> | <b>Cluster</b>                       | <b>Enrichment Score</b> |
| Development                    | 3                       | Development                          | 5.1                     |
| Cell differentiation           | 2.3                     | Regulation of cellular process       | 3.8                     |
| Reproduction                   | 2                       | Regulation of biological process     | 3.7                     |
| Nervous system development     | 1.9                     | Tissue development                   | 3.3                     |
| Regulation of transcription    | 1.9                     | Metabolism                           | 3.2                     |
| Morphogenesis                  | 1.6                     | Metabolic process                    | 3                       |
| Transcription                  | 1.6                     | Apoptosis                            | 2.4                     |
| Cell development               | 1.5                     | Reproduction                         | 2.3                     |
| Regulation of cell development | 1.5                     | Catabolic process                    | 2.2                     |
| Chromosome organization        | 1.4                     | Cell development                     | 1.9                     |
| Cell development               | 1.4                     | Tissue development                   | 1.8                     |
| Immune cell activation         | 1.2                     | Regulation of immune system          | 1.7                     |
| Immune system activation       | 1.6                     | Immune system activation             | 1.6                     |
| Phosphorylation                | 1.2                     | Regulation of immune system          | 1.6                     |
| Regulation of development      | 1                       | Regulation of phosphorylation        | 1.6                     |
| MAPKKK cascade                 | 1                       | Synaptic transmission                | 1.5                     |
| Regulation of kinase cascade   | 1                       | Reproductive process                 | 1.5                     |
| Methylation                    | 1                       | Cell cycle                           | 1.42                    |
|                                |                         | Kinase activity                      | 1.4                     |
|                                |                         | <b>Response to stress/DNA damage</b> | <b>1.4</b>              |
|                                |                         | Axonogenesis                         | 1.4                     |
|                                |                         | Morphogenesis                        | 1.2                     |
|                                |                         | Cell migration                       | 1.2                     |
|                                |                         | Development                          | 1.2                     |
|                                |                         | Cell motion                          | 1.1                     |
|                                |                         | Cell activation                      | 1.1                     |
|                                |                         | Cell differentiation                 | 1.1                     |
|                                |                         | Cell morphogenesis                   | 1                       |
